# Supplementary material for: Synergistic Effects Of Platelet-Rich Fibrin And Photobiomodulation On Migration Of Mg-63 Pre osteoblatic cell line: An In Vitro Study
Source: Research Square preprint supplement (doi:10.21203/rs.3.rs-7444134/v1), 2025-09-09
Supplement: Supplementary file 1 [file 46c72ac06694fd0796ccad35.docx]

**
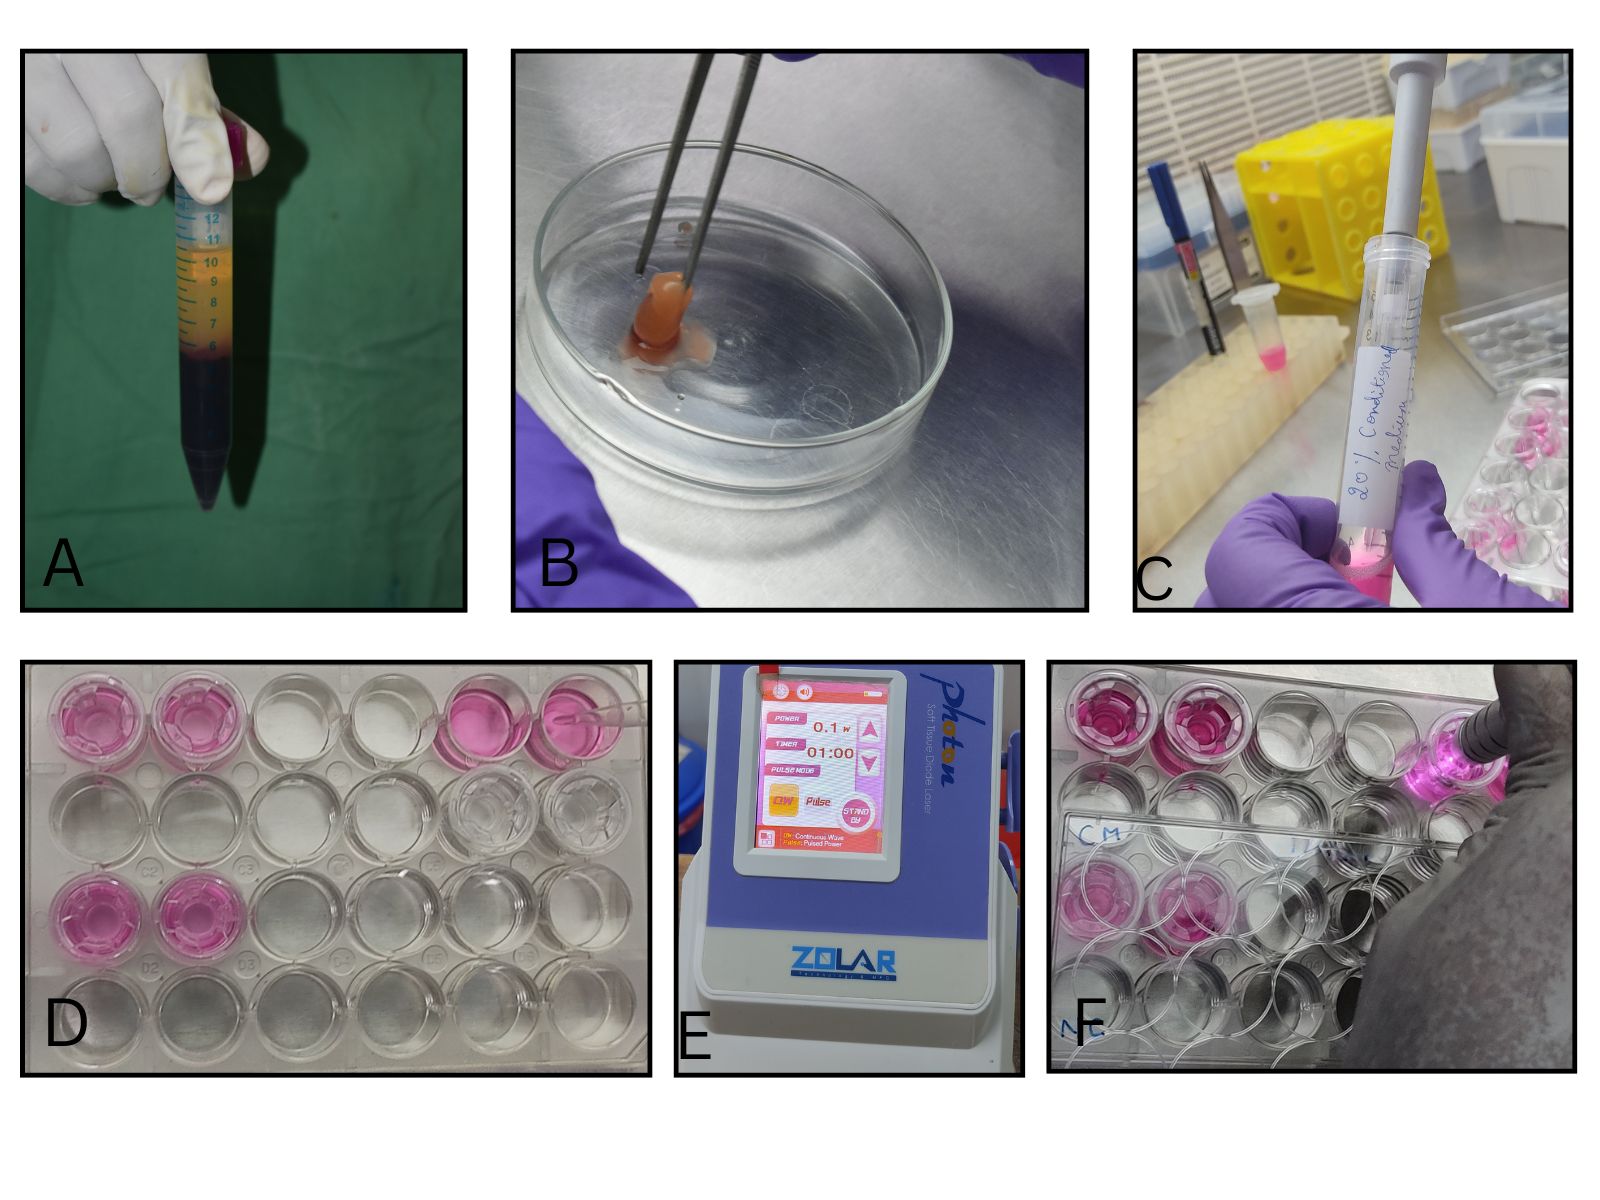
Fig 1: A**: L-PRF obtained after centrifugation **B**: L-PRF transferred to well plate for conditioned media preparation **C**: Prepared 20% conditioned media **D**: Addition of conditioned media to lower compartment of wells **E**: Laser parameters **F**: Diode laser irradiation


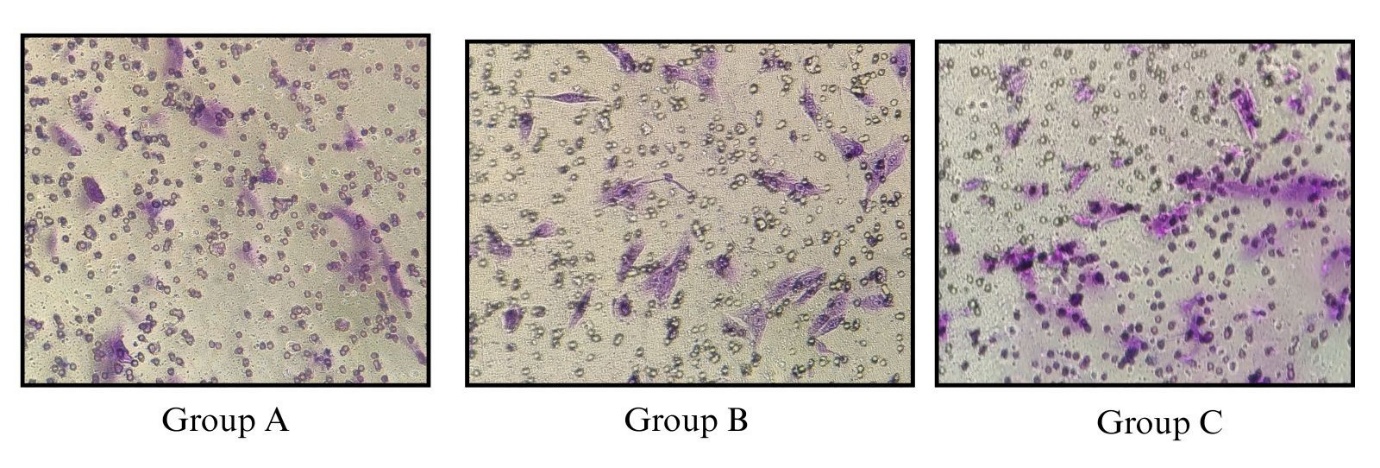


Figure 2: Migrated osteoblasts stained using Crystal violet
